# Supplementary material
Source: Springer Nature journal article supplement (https://www.springermedizin.de/resource/supplementary/13063_2010_675_MOESM3_ESM.pdf/9618444)
Supplement: MOESM3 [file 9618444]

# Development of the Classification System

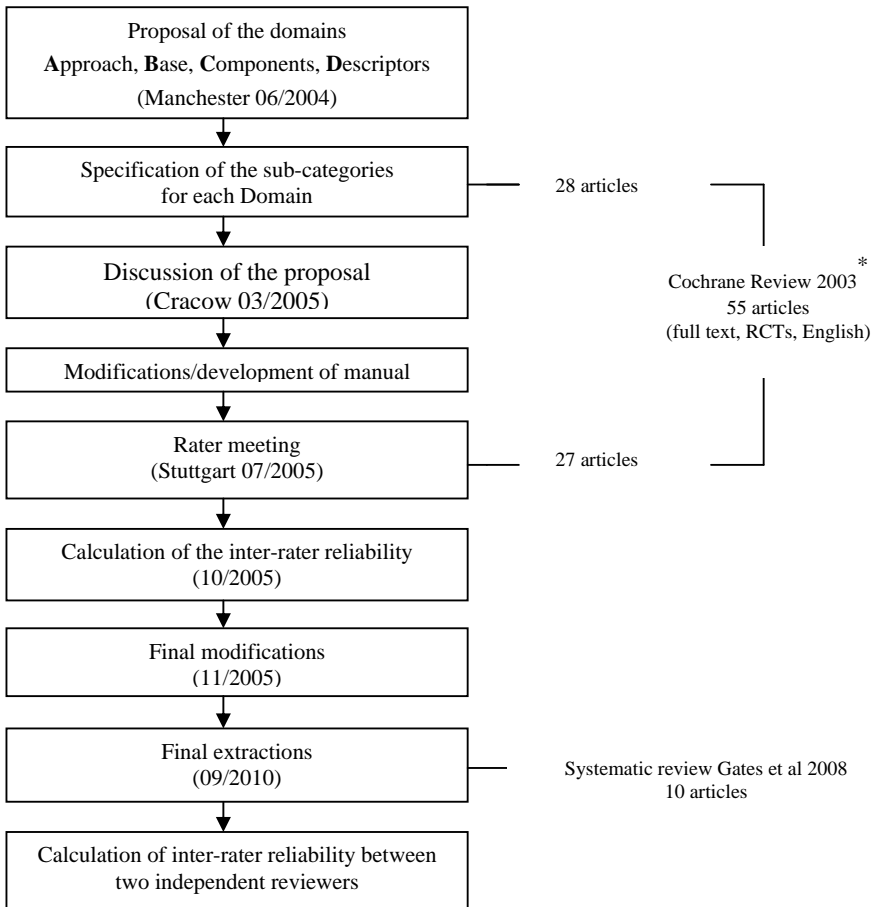

\* Gillespie LD, Gillespie WJ, Robertson MC, Lamb SE, Cumming RG, Rowe BH. Interventions for preventing falls in elderly people. Cochrane Database of Systematic Reviews 2003, Issue 4 . Art. No.: CD000340. DOI: 10.1002/14651858.CD000340 .
